# Supplementary material for: Narrative Nursing–Based Palliative Intervention for Terminally Ill Patients: A Quasi-Experimental Study
Source: Research Square preprint supplement (doi:10.21203/rs.3.rs-6903896/v1), 2025-10-17
Supplement: Supplementary file 1 [file 414c3d944a6891b610c8c634.docx]

**Clinical Trial Registration Statement**

Clinical Trial Registration: Not applicable. The present study employed a quasi-experimental design, which does not fulfill the definition of a clinical trial requiring registration according to relevant guidelines.
